# Supplementary material
Source: PubMed Central journal article supplement (PMC8957703)

# Supplemental Figure 1

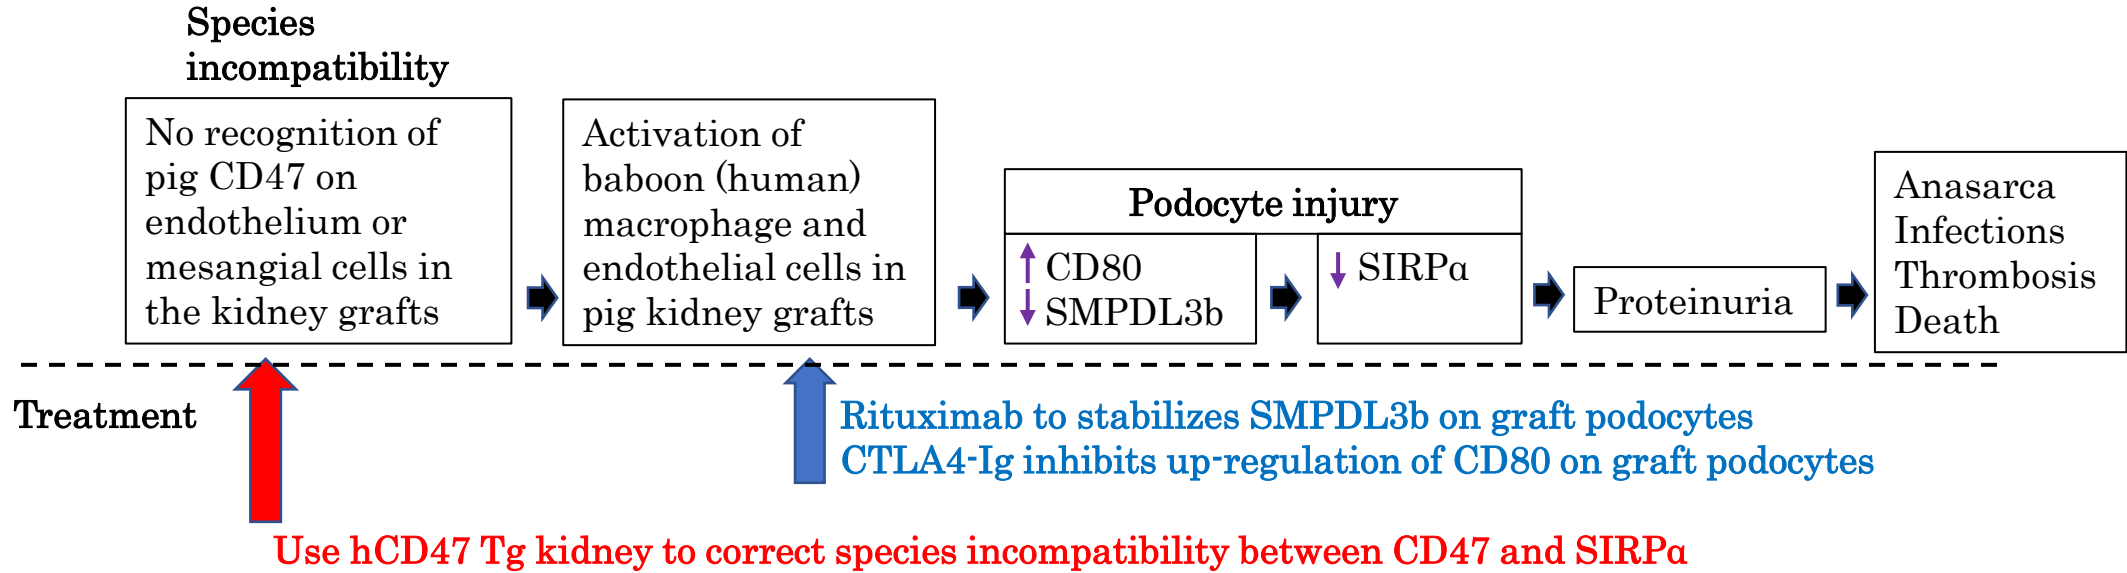

Supplemental Figure 2

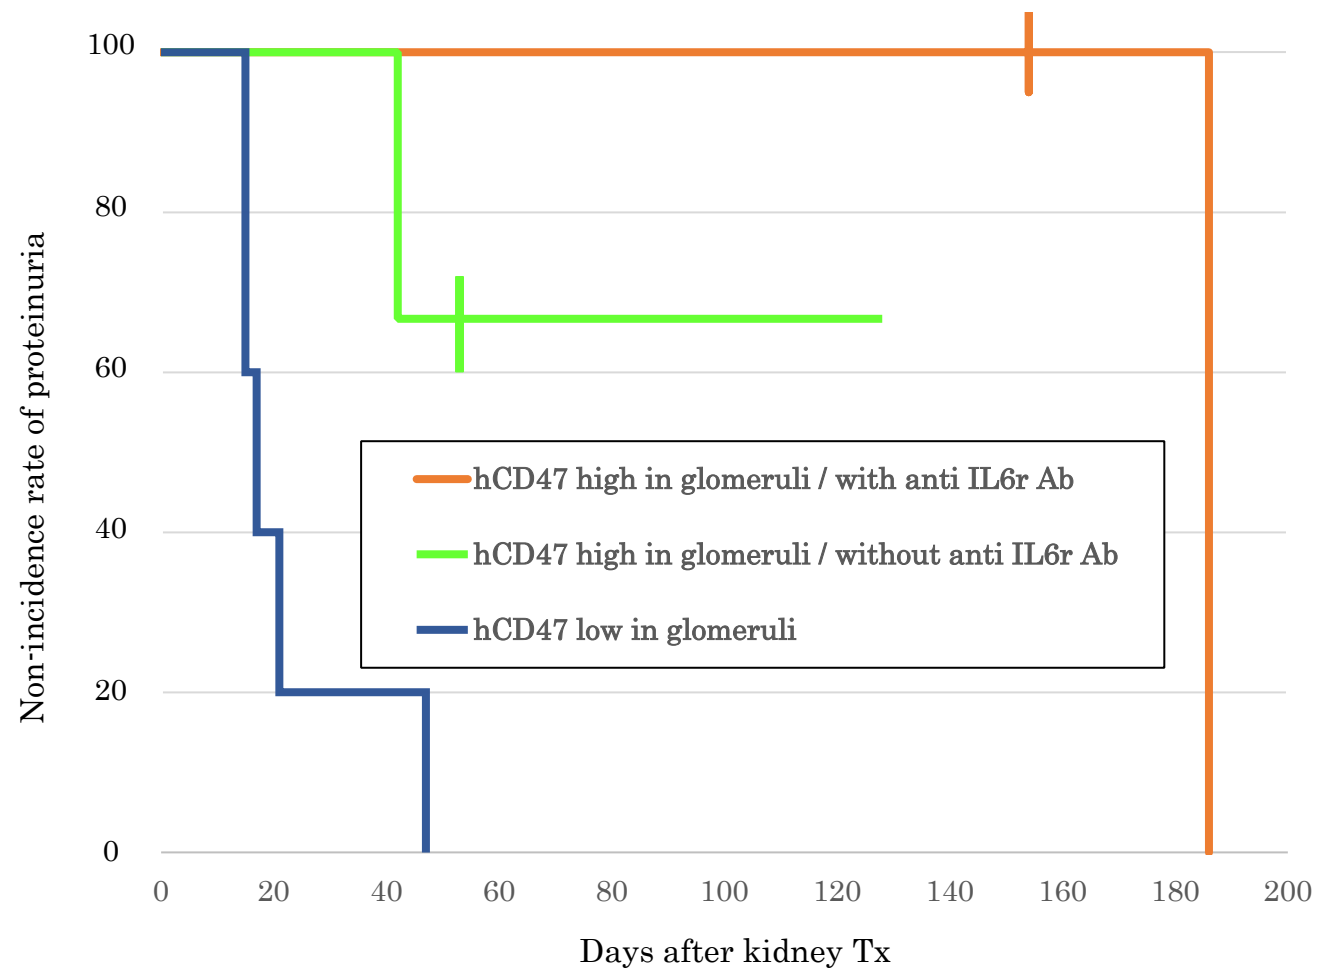

Supplement: NIHMS1785087-supplement-Suppl_Fig.pdf [file NIHMS1785087-supplement-Suppl_Fig.pdf]
